# Supplementary material
Source: bioRxiv or medRxiv preprint supplement (https://medrxiv.org/highwire/filestream/92217/field_highwire_adjunct_files/6/2020.08.04.20167312-7.pdf)
Supplement: Supplementary file [file 2020.08.04.20167312-7.pdf]

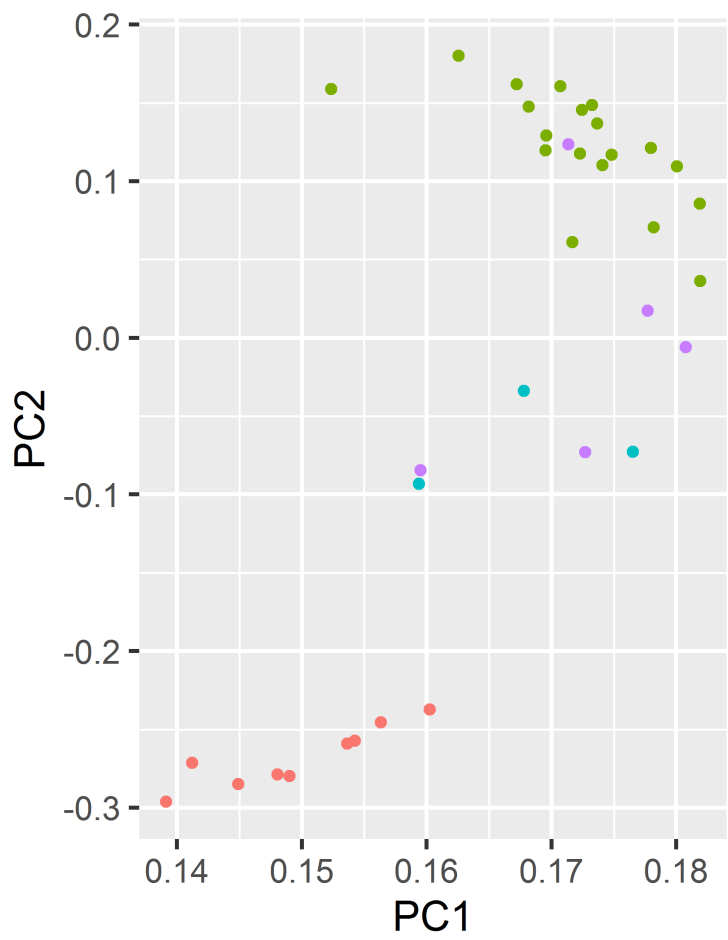

### Groups

- Control
- Ependymoma
- Medulloblastoma
- Pilocytic Astrocytoma
